# Supplementary material for: Effect of Macitentan in Pulmonary Arterial Hypertension and the Relationship Between Echocardiography and cMRI Variables: REPAIR Echocardiography Sub-study Results
Source: PubMed Central journal article supplement — Cardiol Ther. 2024 Jan 28;13(1):173–90. doi: 10.1007/s40119-023-00345-2 (PMC10899124; doi:10.1007/s40119-023-00345-2), 2024-01-28
Supplement: 40119_2023_345_MOESM1_ESM.pdf [file 40119_2023_345_MOESM1_ESM.pdf]

## SUPPLEMENTARY MATERIAL

**Title: Effect of macitentan in pulmonary arterial hypertension and the relationship between echocardiography and cMRI variables: REPAIR echocardiography sub-study results**

**Authors:** Adam Torbicki<sup>1</sup>, Richard Channick<sup>2</sup>, Nazzareno Galiè<sup>3,4</sup>, David G Kiely<sup>5,6</sup>, Pamela Mocerì<sup>7</sup>, Andrew Peacock<sup>8</sup>, Andrew J Swift<sup>6</sup>, Ahmed Tawakol<sup>9</sup>, Anton Vonk Noordegraaf<sup>10</sup>, Dayana Flores<sup>11</sup>, Nicolas Martin<sup>12</sup>, Stephan Rosenkranz<sup>13</sup>

**Affiliations:** <sup>1</sup>Department of Pulmonary Circulation, Thromboembolic Disease and Cardiology, Centre for Postgraduate Medical Education ECZ-Otwock, ERN-LUNG Member, Otwock, Poland; <sup>2</sup>David Geffen School of Medicine at UCLA, Los Angeles, CA, USA; <sup>3</sup>Cardiology Unit, IRCCS Azienda Ospedaliero-Universitaria di Bologna, Bologna, Italy; <sup>4</sup>Dipartimento DIMES, Università di Bologna, Bologna, Italy; <sup>5</sup>Sheffield Pulmonary Vascular Disease Unit, Royal Hallamshire Hospital, Sheffield, UK; <sup>6</sup>National Institute for Health and Care Research Sheffield Biomedical Research Centre, Department of Infection, Immunity & Cardiovascular Disease, University of Sheffield, Sheffield, UK; <sup>7</sup>Cardiology Department, UR2CA, Pasteur University Hospital, Côte-d'Azur University, Nice, France; <sup>8</sup>Scottish Pulmonary Vascular Unit, Glasgow, UK; <sup>9</sup>Massachusetts General Hospital and Harvard Medical School, Boston, USA; <sup>10</sup>Amsterdam UMC, Vrije Universiteit Amsterdam, Amsterdam, The Netherlands; <sup>11</sup>Actelion Pharmaceuticals Ltd, a Janssen Pharmaceutical Company of Johnson & Johnson, Global Medical Affairs, Allschwil, Switzerland; <sup>12</sup>Actelion Pharmaceuticals Ltd, a Janssen Pharmaceutical Company of Johnson & Johnson, Statistical Decision Science, Allschwil, Switzerland; <sup>13</sup>Department of Cardiology, Heart Center, University Hospital Cologne, and Cologne Cardiovascular Research Center (CCRC), University of Cologne, Cologne, Germany.

**Corresponding author:** Adam Torbicki

**Address:** European Health Centre Otwock, F. Chopin Hospital, ul. Borowa 14/18, 05-400 Otwock, Poland

**Email:** [atorbicki@gmail.com](mailto:atorbicki@gmail.com)

**Supplementary material**

|                                                                                                                                                                                                                                                                                                                      | <b>Page</b> |
|----------------------------------------------------------------------------------------------------------------------------------------------------------------------------------------------------------------------------------------------------------------------------------------------------------------------|-------------|
| <b>Table S1.</b> List of Institutional Review Boards and Ethics Committees                                                                                                                                                                                                                                           | 3           |
| <b>Table S2.</b> Changes in additional echo variables from baseline to Weeks 26 and 52 (Echo subgroup, N = 45)                                                                                                                                                                                                       | 6           |
| <b>Table S3.</b> Change in cMRI variables from baseline to Weeks 26 and 52 (Safety set, N = 87)                                                                                                                                                                                                                      | 8           |
| <b>Table S4.</b> Changes in RHC variables and functional parameters from baseline to Week 26 and Week 52 (Safety set, N = 87)                                                                                                                                                                                        | 9           |
| <b>Table S5.</b> Exposure and overview of safety (Echo subgroup, N = 45)                                                                                                                                                                                                                                             | 10          |
| <b>Figure S1.</b> Study design                                                                                                                                                                                                                                                                                       | 11          |
| <b>Figure S2.</b> Patient disposition                                                                                                                                                                                                                                                                                | 12          |
| <b>Figure S3.</b> Correlation analysis of (a) RV stroke volume echo versus RV stroke volume cMRI, (b) LV stroke volume echo versus LV stroke volume cMRI, (c) 2D global longitudinal RV strain echo versus RV ejection fraction by volume cMRI, (d) LVEDV echo versus LVEDV cMRI, at Week 26 (Echo subgroup, N = 45) | 13          |

**Table S1.** List of Institutional Review Boards and Ethics Committees

| <b>Country</b>   | <b>Site</b>         | <b>Ethics Committee</b>                                                                                                                                                                     | <b>Address</b>                                                                                                                                                             | <b>Central or local</b> |
|------------------|---------------------|---------------------------------------------------------------------------------------------------------------------------------------------------------------------------------------------|----------------------------------------------------------------------------------------------------------------------------------------------------------------------------|-------------------------|
| <b>Malaysia</b>  | 9001                | IJN Research Ethics Committee                                                                                                                                                               | National Heart Institute 145, Jalan Tun Razak, 50400 Kuala Lumpur, Malaysia                                                                                                | Local                   |
| <b>Singapore</b> | 1201, 1202*         | NHG Domain Specific Review Board (DSRB)                                                                                                                                                     | Domain Specific Review Board (DSRB)<br>c/o National Healthcare Group, NHG Group Research Nexus @One-North (South Tower), No. 3 Fusionopolis Link, #03-08, Singapore 138543 | Local                   |
| <b>Hong Kong</b> | 1301, 1302          | Institutional Review Board of the University of Hong Kong/ Hospital Authority Hong Kong West Cluster (HKU/HA HKW IRB)                                                                       | Rm 901, 9/F, Administration Block, Queen Mary Hospital, 102 Pokfulam Road, Hong Kong                                                                                       | Local                   |
|                  | 1303                | Research Ethics Committee (Kowloon Central/ Kowloon East Cluster) [REC (KC/KE)]                                                                                                             | Rm 808, 8/F, Block S, Queen Elizabeth Hospital, 30 Gascoigne Road, Hong Kong                                                                                               | Local                   |
| <b>Russia</b>    | 1101                | Ethics Committee of Federal State Budgetary Institution “Almazov National Medical Research Centre” of the Ministry of Health of the Russian Federation                                      | 2 Akkuratova street, St. Petersburg 197341                                                                                                                                 | Local                   |
|                  | 1102                | Independent Ethics Committee of clinical trials of Federal State Budgetary Institution “National Medical Research Centre of Cardiology” of the Ministry of Health of the Russian Federation | 3-d Cherepkovskaya street, 15a, Moscow, 121552                                                                                                                             | Local                   |
| <b>Israel</b>    | 8001                | Ethics Helsinki Committee                                                                                                                                                                   | Bait Shmuel Street 12 POB 3235, JERUSALEM zip: 91031, ISRAEL                                                                                                               | Local                   |
|                  | 8002                | Ethics Helsinki Committee                                                                                                                                                                   | Rager Blvd Beer-Sheva 85025, ISRAEL                                                                                                                                        | Local                   |
| <b>USA</b>       | 1001*               | Partners Human Research Committee                                                                                                                                                           | 399 Revolution Drive Suite # 710 Somerville MA, 02145, US                                                                                                                  | Local                   |
|                  | 1002*, 1004*, 1005, | Western Institutional Review Board                                                                                                                                                          | 1019 39th Ave SE #120, Puyallup, WA 98374, US                                                                                                                              | Local                   |

|                  |                                                                                         |                                                                                                     |                                                                                 |         |
|------------------|-----------------------------------------------------------------------------------------|-----------------------------------------------------------------------------------------------------|---------------------------------------------------------------------------------|---------|
|                  | 1010*,<br>1014*                                                                         |                                                                                                     |                                                                                 |         |
|                  | 1006                                                                                    | UT Southwestern<br>Institutional Review Board                                                       | 5323 Harry Hines Blvd,<br>Dallas, TX 75390, US                                  | Local   |
|                  | 1007*                                                                                   | Aurora Health Care<br>Research Subject<br>Protection Program and IRB<br>office                      | 945 N. 12th Street P.O. Box 342<br>W310<br>Milwaukee, WI 53201-0342, US         | Local   |
|                  | 1008*                                                                                   | Weill Cornell Medicine IRB                                                                          | 1300 York Ave. New York, NY<br>10065, US                                        | Local   |
|                  | 1009*                                                                                   | University of Minnesota<br>Human Research Protection<br>Program                                     | 350-2 McNamara 200 Oak St. SE<br>Minneapolis, MN 55414, US                      | Local   |
|                  | 1012                                                                                    | The Washington University<br>in St Louis IRB                                                        | 4590 Children's Place, Suite<br>2300   St. Louis, MO 63110, US                  | Local   |
|                  | 1015*                                                                                   | Houston Methodist Research<br>Institute IRB                                                         | 6670 Bertner Ave, Houston, TX<br>77030, États-Unis                              | Local   |
| <b>Australia</b> | 2001*                                                                                   | The Prince Charles Hospital<br>HREC                                                                 | Building 14 Rode Road,<br>Chermside QLD 4032 Australia                          | Central |
| <b>France</b>    | (3002),<br>(3003)*,<br>(3004)*,<br>(3005),<br>(3007),<br>(3008),<br>(3010)*,<br>(3011)  | Comité de Protection des<br>Personnes Est III                                                       | Hôpital de Brabois. Rue du<br>Morvan, 54500 Vandœuvre-<br>lès-<br>Nancy, France | Central |
| <b>Germany</b>   | (4001),<br>(4002)*,<br>(4003),<br>(4004)*,<br>(4005),<br>(4006)*,<br>(4007),<br>(4008)* | Ethic Committee of the<br>Medical Faculty of<br>Heidelberg                                          | Alte Glockengießerei 11/1,<br>69115 Heidelberg, Germany                         | Central |
| <b>Italy</b>     | 5001*                                                                                   | Comitato Etico Azienda<br>Ospedaliero Universitaria di<br>Bologna Policlinico S.Orsola-<br>Malpighi | Via Albertoni 15 40138 Bologna,<br>Italy                                        | Central |
|                  | 5002                                                                                    | Comitato di Bioetica della<br>Fondazione IRCCS<br>Policlinico S. Matteo di Pavia                    | Viale Golgi, 19 27100 Pavia, Italy                                              | Local   |

|                       |                                                      |                                                                                    |                                                                                                                      |         |
|-----------------------|------------------------------------------------------|------------------------------------------------------------------------------------|----------------------------------------------------------------------------------------------------------------------|---------|
| <b>Netherlands</b>    | (6001),<br>(6002),<br>(6004),<br>(6005)*,<br>(6006)* | Medical Ethical Committee<br>VU                                                    | De Boelelaan 1117 1081 HV<br>Amsterdam, Netherlands                                                                  | Central |
| <b>United Kingdom</b> | (7001)*,<br>(7003),<br>(7005)                        | NRES Committee Yorkshire<br>& The Humber – Leeds West<br>Health Research Authority | Jarrow REC Centre, Room 001,<br>Jarrow Business Centre, Rolling<br>Mill Road, Jarrow, Tyne and<br>Wear. NE32 3DT, UK | Central |

\*Sites that were initiated but did not enrol any patients (if applicable)

**Table S2.** Change in additional echo variables from baseline to Weeks 26 and 52 (Echo subgroup, N = 45)

| <b>Echo variables</b>                                  | <b>n</b> | <b>Baseline<br/>Mean (SD)</b> | <b>Change from baseline<br/>to Week 26 LS mean<sup>a</sup><br/>(95% CL)</b> | <b>n</b> | <b>Change from baseline<br/>to Week 52 LS mean<sup>a</sup><br/>(95% CL)</b> |
|--------------------------------------------------------|----------|-------------------------------|-----------------------------------------------------------------------------|----------|-----------------------------------------------------------------------------|
| Tricuspid peak annular velocity, s', cm/s              | 27       | 9.7 (2.8)                     | 2.1 (1.1, 3.0)                                                              | 26       | 1.2 (0.4, 2.1)                                                              |
| RV ejection time <sup>b</sup> , msec                   | 32       | 283.0 (47.4)                  | 26.2 (11.6, 40.7)                                                           | 27       | 42.1 (22.9, 61.3)                                                           |
| RV ejection time <sup>c</sup> , msec                   | 28       | 274.7 (47.9)                  | 14.5 (-1.6, 30.6)                                                           | 27       | 23.1 (11.3, 34.9)                                                           |
| Total RV systolic time <sup>b</sup> , msec             | 29       | 465.5 (54.2)                  | -13.7 (-30.3, 2.9)                                                          | 25       | -9.2 (-34.3, 16.0)                                                          |
| Total RV systolic time <sup>c</sup> , msec             | 28       | 453.0 (73.8)                  | 0.5 (-16.2, 17.2)                                                           | 27       | 14.1 (-6.1, 34.3)                                                           |
| LV stroke volume index, mL/m <sup>2</sup>              | 29       | 28.9 (9.9)                    | 5.3 (2.2, 8.4)                                                              | 25       | 6.8 (3.1, 10.5)                                                             |
| Cardiac output <sup>d</sup> , L/min                    | 29       | 3.7 (1.1)                     | 0.47 (0.07, 0.88)                                                           | 25       | 0.64 (0.25, 1.04)                                                           |
| RV Myocardial Performance Index <sup>c</sup>           | 28       | 0.66 (0.22)                   | -0.08 (-0.16, <0.01)                                                        | 27       | -0.09 (-0.18, 0.01)                                                         |
| Mitral peak E-wave velocity, cm/s                      | 36       | 57.1 (17.0)                   | 10.6 (4.5, 16.6)                                                            | 32       | 18.0 (11.4, 24.6)                                                           |
| Mitral peak A-wave velocity, cm/s                      | 35       | 62.7 (19.1)                   | -0.06 (-5.0, 4.9)                                                           | 32       | -0.14 (-4.7, 4.4)                                                           |
| Mitral E/E' ratio                                      | 29       | 6.07 (2.81)                   | 0.16 (-0.80, 1.12)                                                          | 30       | 0.31 (-0.30, 0.91)                                                          |
| Mitral annulus peak early diastolic velocity, e', cm/s | 30       | 10.2 (3.8)                    | 2.1 (1.1, 3.0)                                                              | 31       | 1.9 (1.0, 2.8)                                                              |
| RV end-diastolic area, cm <sup>2</sup>                 | 42       | 28.1 (6.3)                    | -1.7 (-3.2, -0.2)                                                           | 38       | -2.5 (-4.0, -1.0)                                                           |
| RV end-systolic area, cm <sup>2</sup>                  | 42       | 21.3 (7.0)                    | -3.2 (-4.9, -1.6)                                                           | 38       | -3.6 (-5.0, -2.2)                                                           |
| LV end-systolic volume, mL                             | 32       | 23.9 (11.0)                   | 5.2 (2.2, 8.3)                                                              | 31       | 2.6 (-0.62, 5.9)                                                            |
| LV eccentricity index, end-diastole                    | 34       | 1.4 (0.31)                    | -0.03 (-0.15, 0.09)                                                         | 27       | -0.03 (-0.14, 0.07)                                                         |
| LV eccentricity index, end-systole                     | 34       | 1.7 (0.54)                    | -0.16 (-0.32, 0.01)                                                         | 28       | -0.02 (-0.24, 0.20)                                                         |
| RV acceleration time <sup>b</sup> , msec               | 31       | 79.6 (25.8)                   | 8.6 (-1.1, 18.3)                                                            | 26       | 17.6 (7.2, 28.0)                                                            |

REPAIR Echo manuscript

|                                               |    |             |                      |    |                      |
|-----------------------------------------------|----|-------------|----------------------|----|----------------------|
| <b>RV acceleration time<sup>c</sup>, msec</b> | 25 | 83.0 (25.3) | -10.4 (-18.8, -2.0)  | 23 | -4.3 (-15.3, 6.8)    |
| <b>Pericardial effusion size</b>              | 43 | 0.42 (0.63) | -0.14 (-0.25, -0.04) | 38 | -0.13 (-0.25, -0.01) |

<sup>a</sup>Analyzed using an ANCOVA with a factor for PAH background therapy and a covariate for baseline parameter value. <sup>b</sup>By pulsed wave doppler. <sup>c</sup>By tissue doppler. <sup>d</sup>Determined from LV outflow tract. ANCOVA: analysis of covariance; CL: confidence limit; echo: echocardiography; LS: least squares; LV; left ventricular; PJV: peak jet velocity; RV: right ventricular; SD: standard deviation.

**Table S3.** Change in cMRI variables from baseline to Weeks 26 and 52 (Safety set, N = 87)

| cMRI variables                                  | n  | Baseline<br>Mean (SD) | Change from baseline<br>to Week 26 <sup>a</sup> LS Mean<br>(95% CL) | n  | Baseline<br>Mean (SD) | Change from baseline<br>to Week 52 <sup>a</sup> LS Mean<br>(95% CL) |
|-------------------------------------------------|----|-----------------------|---------------------------------------------------------------------|----|-----------------------|---------------------------------------------------------------------|
| RV stroke volume by flow <sup>b</sup> , mL      | 73 | 52.1 (17.8)           | 11.6 (8.1, 15.1) <sup>c</sup>                                       | 68 | 51.9 (17.8)           | 12.7 (9.3, 16.2)                                                    |
| RV stroke volume by volume <sup>d</sup> , mL    | 78 | 58.5 (20.7)           | 10.0 (6.0, 13.9)                                                    | 72 | 59.0 (21.2)           | 13.0 (8.9, 17.0)                                                    |
| RVEDV, mL                                       | 78 | 148.4 (47.8)          | -6.2 (-12.5, 0.1)                                                   | 72 | 148.0 (46.2)          | -5.4 (-11.7, 0.8)                                                   |
| RVESV, mL                                       | 78 | 90.0 (40.9)           | -16.4 (-20.6, -12.2)                                                | 72 | 89.0 (38.4)           | -18.7 (-23.6, -13.8)                                                |
| RV ejection fraction by flow <sup>b</sup> , %   | 72 | 37.8 (15.0)           | 10.1 (7.5, 12.8)                                                    | 67 | 37.6 (15.0)           | 10.0 (7.5, 12.5)                                                    |
| RV ejection fraction by volume <sup>d</sup> , % | 78 | 41.2 (12.8)           | 8.5 (6.8, 10.2)                                                     | 72 | 41.5 (12.6)           | 10.5 (8.3, 12.6)                                                    |
| RV mass, g                                      | 78 | 110.6 (46.8)          | -10.1 (-13.8, -6.4)                                                 | 72 | 111.2 (47.8)          | -8.8 (-13.1, -4.6)                                                  |
| LV stroke volume by flow <sup>e</sup> , mL      | 71 | 47.2 (14.8)           | 13.4 (10.5, 16.4)                                                   | 67 | 47.5 (15.5)           | 14.0 (11.0, 16.9)                                                   |
| LV stroke volume by volume <sup>d</sup> , mL    | 78 | 54.2 (17.6)           | 15.5 (12.2, 18.8)                                                   | 72 | 54.9 (18.4)           | 14.6 (11.5, 17.6)                                                   |
| LVEDV, mL                                       | 78 | 86.1 (28.2)           | 16.9 (12.2, 21.5)                                                   | 72 | 87.4 (29.1)           | 16.6 (12.6, 20.6)                                                   |
| LVESV, mL                                       | 78 | 31.9 (16.0)           | 1.4 (-1.1, 3.9)                                                     | 72 | 32.4 (15.8)           | 2.1 (-0.3, 4.5)                                                     |
| LV ejection fraction by flow <sup>e</sup> , %   | 70 | 56.1 (11.5)           | 3.5 (1.1, 5.9)                                                      | 67 | 55.7 (11.3)           | 5.0 (2.7, 7.3)                                                      |
| LV ejection fraction by volume <sup>d</sup> , % | 78 | 64.0 (10.9)           | 4.5 (3.0, 6.0)                                                      | 72 | 63.8 (10.6)           | 4.0 (2.4, 5.6)                                                      |
| LV mass, g                                      | 78 | 103.5 (24.3)          | 3.7 (1.5, 6.0)                                                      | 72 | 104.4 (25.8)          | 4.1 (1.5, 6.7)                                                      |
| RVEDV / LVEDV <sup>f</sup>                      | 78 | 1.80 (0.66)           | 0.79 (0.76, 0.83) <sup>g</sup>                                      | 72 | 1.80 (0.65)           | 0.80 (0.77, 0.84) <sup>g</sup>                                      |
| RVESV / LVESV <sup>f</sup>                      | 78 | 3.20 (1.71)           | 0.78 (0.73, 0.83) <sup>g</sup>                                      | 72 | 3.20 (1.73)           | 0.73 (0.67, 0.80) <sup>g</sup>                                      |

<sup>a</sup>Analyzed using an ANCOVA with a factor for PAH background therapy and a covariate for baseline. <sup>b</sup>Determined from pulmonary artery flow. <sup>c</sup>95% CL. <sup>d</sup>Determined from volume. <sup>e</sup>Determined from aortic flow. <sup>f</sup>Log transformed. <sup>g</sup>Geometric mean ratio of week 26<sup>a</sup> to baseline (95% CL). ANCOVA: analysis of covariance; CL: confidence limit; cMRI: cardiac magnetic resonance imaging; LS: least squares; LV: left ventricular; LVEDV: LV end-diastolic volume; LVESV: LV end-systolic volume; PAH: pulmonary arterial hypertension; RV: right ventricular; RVEDV: RV end-diastolic volume; RVESV: RV end-systolic volume; SD: standard deviation.



**Table S4.** Changes in RHC variables and functional parameters from baseline to Week 26 and Week 52 (Safety set, N = 87)

| <b>RHC parameters</b>                      |          |                              |                                                                                      |          |                              |                                                                                      |
|--------------------------------------------|----------|------------------------------|--------------------------------------------------------------------------------------|----------|------------------------------|--------------------------------------------------------------------------------------|
|                                            | <b>n</b> | <b>Baseline</b><br>Mean (SD) | <b>Change from baseline</b><br><b>to Week 26<sup>a</sup></b><br>LS Mean (95% CL)     |          |                              |                                                                                      |
| <b>PVR (dyn.sec/cm<sup>5</sup>)</b>        | 80       | 984.7 (669.1)                | -376.2 (-466.3, -286.1) <sup>b</sup>                                                 |          |                              |                                                                                      |
| <b>mPAP (mmHg)</b>                         | 80       | 53.5 (15.2)                  | -7.9 (-10.1, -5.8)                                                                   |          |                              |                                                                                      |
| <b>mRAP (mmHg)</b>                         | 79       | 6.8 (4.2)                    | -0.5 (-1.2, 0.3)                                                                     |          |                              |                                                                                      |
| <b>Cardiac index (L/min/m<sup>2</sup>)</b> | 80       | 2.4 (0.7)                    | 0.5 (0.4, 0.7)                                                                       |          |                              |                                                                                      |
| <b>Functional parameters</b>               |          |                              |                                                                                      |          |                              |                                                                                      |
|                                            | <b>n</b> | <b>Baseline</b><br>Mean (SD) | <b>Change from baseline</b><br><b>to Week 26<sup>a</sup></b><br>LS Mean (95% CL)     | <b>n</b> | <b>Baseline</b><br>Mean (SD) | <b>Change from baseline</b><br><b>to Week 52<sup>a</sup></b><br>LS Mean (95% CL)     |
| <b>6MWD (m)</b>                            | 83       | 405.3 (116.7)                | 38.9 (24.2, 53.5)                                                                    | 76       | 406.8 (118.4)                | 40.5 (22.5, 58.5)                                                                    |
|                                            | <b>n</b> | <b>Baseline</b><br>Mean (SD) | <b>Geometric mean ratio of</b><br><b>Week 26<sup>a</sup> to baseline</b><br>(95% CL) | <b>n</b> | <b>Baseline</b><br>Mean (SD) | <b>Geometric mean ratio</b><br><b>of Week 52<sup>a</sup> to baseline</b><br>(95% CL) |
| <b>NTproBNP (ng/L)</b>                     | 72       | 1172.8<br>(1824.0)           | 0.4 (0.4, 0.5)                                                                       | 68       | 1210.9<br>(2019.2)           | 0.4 (0.4, 0.5)                                                                       |

<sup>a</sup>Analyzed using an ANCOVA with a factor for PAH background therapy and a covariate for baseline value. <sup>b</sup>Change from baseline to Week 26<sup>a</sup> Mean (95% CL). 6MWD: 6-minute walk distance; ANCOVA: analysis of covariance; CL: confidence limit; LS: least squares; mPAP: mean pulmonary arterial pressure; mRAP: mean right atrial pressure; NTproBNP: N-terminal pro-brain natriuretic peptide; PAH: pulmonary arterial hypertension; PVR: pulmonary vascular resistance; RHC: right heart catheterization; SD: standard deviation.

**Table S5.** Exposure and overview of safety (Echo subgroup, N = 45)

|                                                                                                                        | <b>Echo subgroup<br/>(N = 45)</b> |
|------------------------------------------------------------------------------------------------------------------------|-----------------------------------|
| <b>Duration of study treatment (weeks)</b>                                                                             |                                   |
| Mean (SD)                                                                                                              | 48.2 (10.9)                       |
| Median (Min, Max)                                                                                                      | 51.9 (5.4, 54.7)                  |
| <b>AEs and SAEs</b>                                                                                                    |                                   |
| <b>Patients with <math>\geq 1</math> treatment-emergent AE (<math>\geq 10\%</math> of patients), n (%)</b>             | <b>39 (86.7)</b>                  |
| Peripheral edema                                                                                                       | 12 (26.7)                         |
| Headache                                                                                                               | 11 (24.4)                         |
| Dizziness                                                                                                              | 9 (20.0)                          |
| Cough                                                                                                                  | 7 (15.6)                          |
| Diarrhea                                                                                                               | 7 (15.6)                          |
| Myalgia                                                                                                                | 7 (15.6)                          |
| Nasopharyngitis                                                                                                        | 6 (13.3)                          |
| Back pain                                                                                                              | 5 (11.1)                          |
| Nasal congestion                                                                                                       | 5 (11.1)                          |
| <b>Patients with <math>\geq 1</math> AE leading to discontinuation of study treatment<br/>by Preferred Term, n (%)</b> | <b>5 (11.1)</b>                   |
| Increased aspartate aminotransferase                                                                                   | 2 (4.4)                           |
| Increased liver function test                                                                                          | 1 (2.2)                           |
| Peripheral edema                                                                                                       | 1 (2.2)                           |
| Increased transaminases                                                                                                | 1 (2.2)                           |
| <b>Patients with <math>\geq 1</math> treatment-emergent SAE, n (%)</b>                                                 | <b>5 (11.1)</b>                   |
| <b>Fatal treatment-emergent SAE</b>                                                                                    | <b>0</b>                          |

Preferred Terms are based on MedDRA version 22.0. AE: adverse event; MedDRA: Medical Dictionary for Regulatory Activities; AE: adverse event; echo: echocardiography; SAE: serious AE; SD: standard deviation.

**Figure S1.** Study design

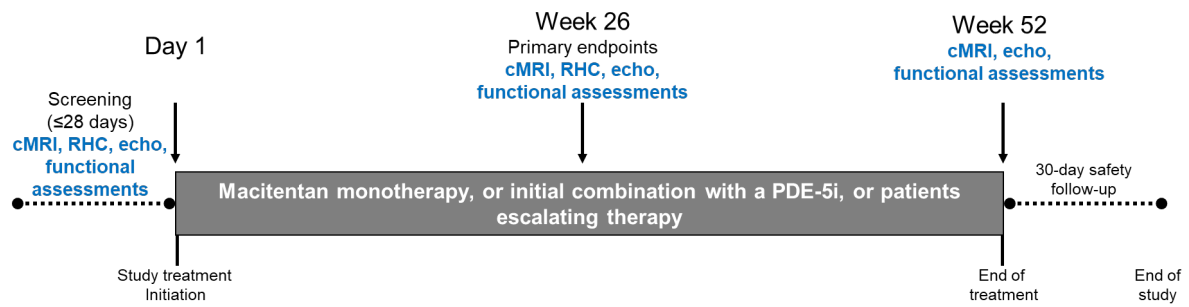

Study design figure adapted from the previously published article [1]. Physicians' choice of treatment strategy, macitentan (10 mg) initiated: in treatment-naïve patients; in patients receiving stable background PDE-5i; in treatment-naïve patients as initial combination with a PDE-5i. cMRI: cardiac magnetic resonance imaging; echo: echocardiography; PDE-5i: phosphodiesterase type 5 inhibitor; RHC: right heart catheterization.

**Figure S2.** Patient disposition

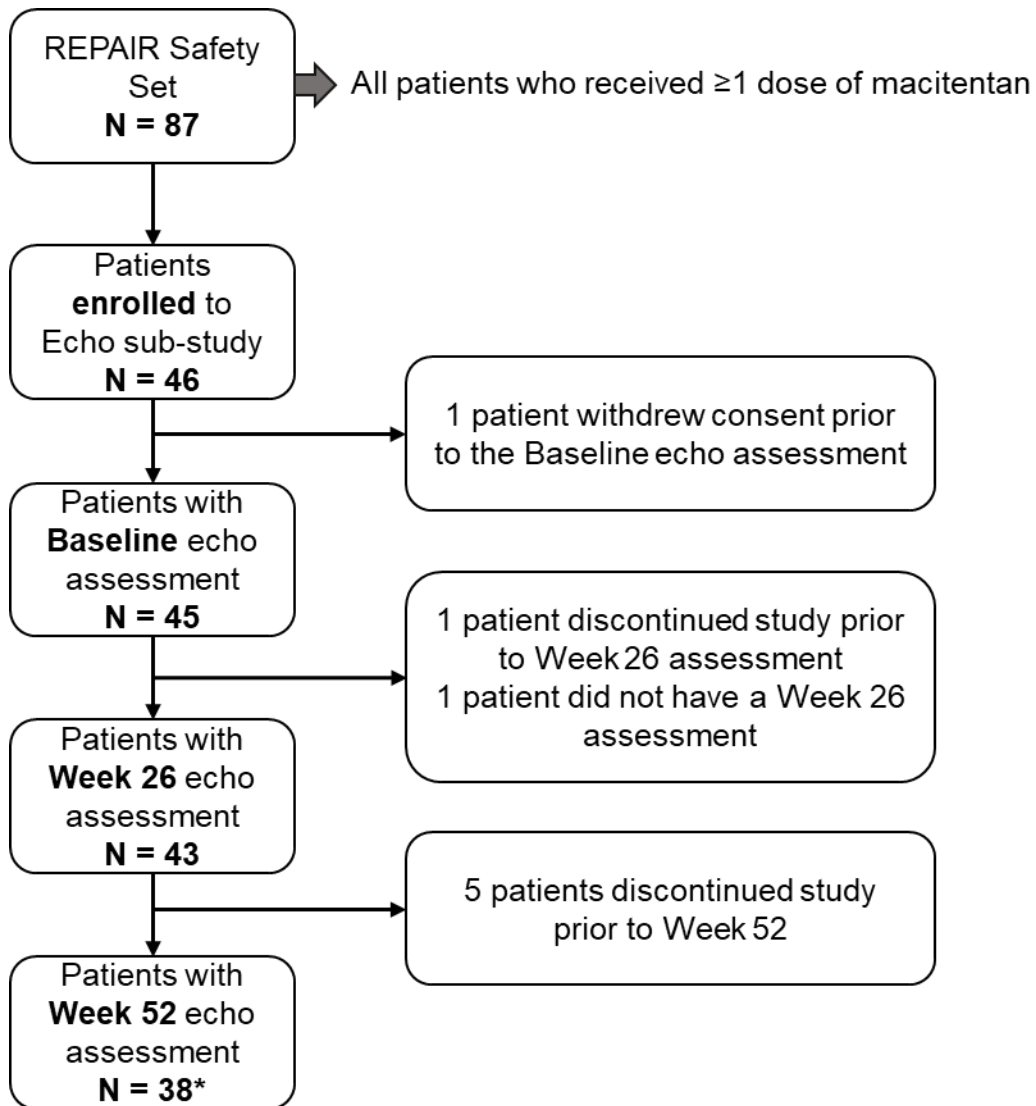

\*Includes one patient who did not have a Week 26 echo assessment performed. Echo: echocardiography.

**Figure S3.** Correlation analysis of (a) RV stroke volume echo *versus* RV stroke volume cMRI (N = 29), (b) LV stroke volume echo *versus* LV stroke volume cMRI (N = 30), (c) 2D global longitudinal RV strain echo *versus* RV ejection fraction by volume cMRI (N = 35), (d) LVEDV echo *versus* LVEDV cMRI (N = 37), at Week 26 (Echo subgroup, N = 45)

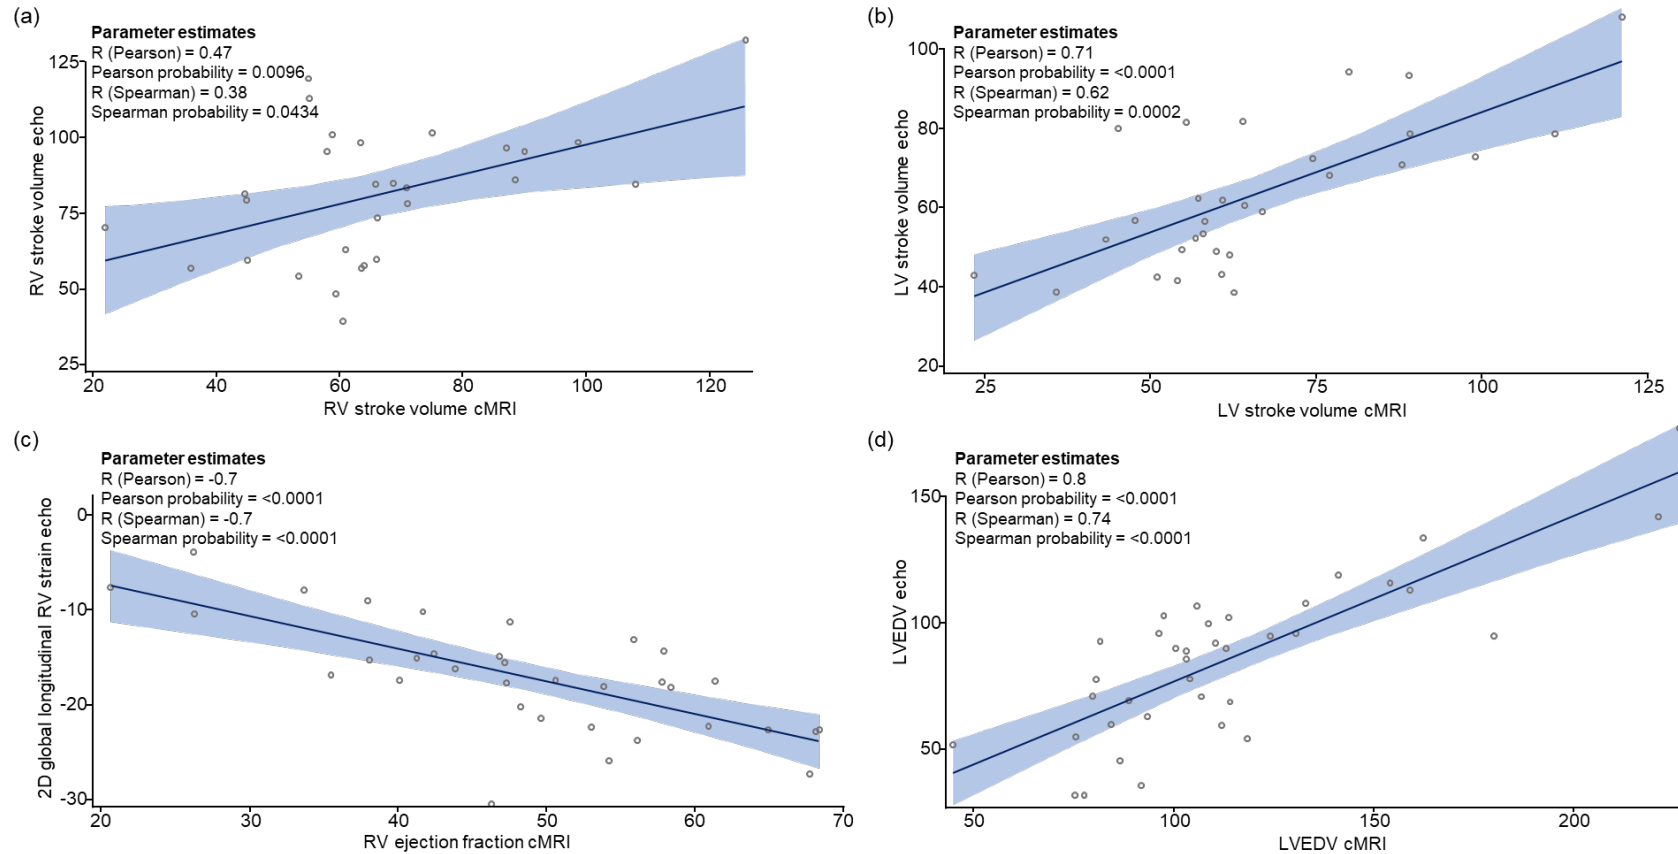

The bands show the 95% confidence limits. cMRI: cardiac magnetic resonance imaging; echo: echocardiography; LV: left ventricular; LVEDV: LV end-diastolic volume; RV: right ventricular.

**References**

1. Vonk Noordegraaf A, Channick R, Cottreel E, Kiely DG, Marcus JT, Martin N, et al. The REPAIR Study: Effects of Macitentan on RV Structure and Function in Pulmonary Arterial Hypertension. *JACC Cardiovasc Imaging*. 2022;15:240–53. doi:10.1016/j.jcmg.2021.07.027.
